# Supplementary material for: A FRET sensor for the real-time detection of long chain acyl-CoAs and synthetic ABHD5 ligands
Source: PubMed Central journal article supplement — Cell Rep Methods. 2023 Jan 25;3(2):100394. doi: 10.1016/j.crmeth.2023.100394 (PMC10014278; doi:10.1016/j.crmeth.2023.100394), 2023-01-25
Supplement: mmc1.pdf [file mmc1.pdf]

**Cell Reports Methods, Volume 3**

**Supplemental information**

**A FRET sensor for the real-time detection  
of long chain acyl-CoAs  
and synthetic ABHD5 ligands**

**Emilio P. Mottillo, Ljiljana Mladenovic-Lucas, Huamei Zhang, Li Zhou, Christopher V. Kelly, Pablo A. Ortiz, and James G. Granneman**

**Table S1: Plasmid constructs used in this study. Related to Figure 1, Figure 4 and STAR Methods.**

| <b>Construct</b>                                                       | <b>Basal FRET</b> | <b>Oleic Acid</b> | <b>SR3420</b>  | <b>Note</b>                 |
|------------------------------------------------------------------------|-------------------|-------------------|----------------|-----------------------------|
| ECFP-ABHD5-<br>Plin5 <sup>384-417</sup> -EYFP                          | +++               | -                 | -              |                             |
| ABHD5_cpVenus<br>-Plin5 <sup>360-417</sup> -CFP                        | ++                | -                 | -              |                             |
| pCFP-ABHD5-YFP-<br>PLIN5 <sup>384-417</sup>                            | ++                | Decrease FRET     | Increase FRET  | Cerulean and Citrine dimers |
| pCFP-ABHD5 <sup>R299N</sup><br>-YFP-PLIN5 <sup>384-417</sup>           | ++                | Decrease FRET     | Increase FRET  | Defective PNPLA2 activation |
| pCFP-ABHD5 <sup>R116N</sup><br>-YFP-PLIN5 <sup>384-417</sup>           | ++                | Decrease FRET     | Not Determined | Defective LD binding        |
| Lyn11-pCFP-<br>ABHD5 <sup>R116N</sup><br>-YFP-PLIN5 <sup>384-417</sup> | ++                | Decrease FRET     | Not Determined | Plasma membrane targeting   |

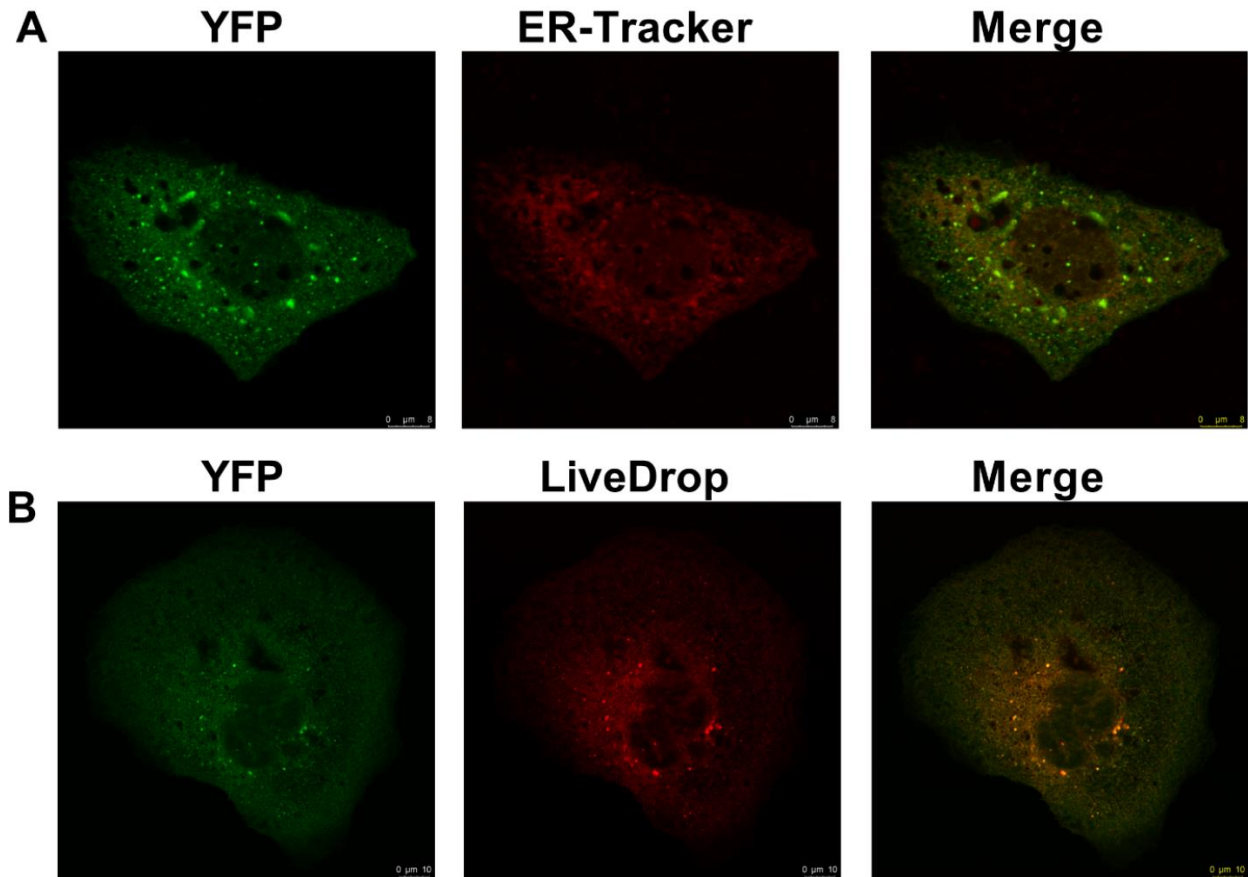

**Figure S1. The LC-acyl-CoA sensor localized to ER and sites of de novo LD formation, related to Figure 1. A,** U2OS cells transiently transfected with the ABHD5<sup>R299N</sup> LC-acyl-CoA sensor (YFP, green) and stained with ER-tracker red (Red) demonstrating co-localization in the merged image (Merge). Scale bar, 8 μm. **B,** U2OS cells transiently transfected with the ABHD5<sup>R299N</sup> LC-acyl-CoA sensor (YFP, green) and Cherry-LiveDrop (Red) demonstrating co-localization in the merged image (Merge). Scale bar, 10 μm. Results are from one experiments and representative of three independent experiments.

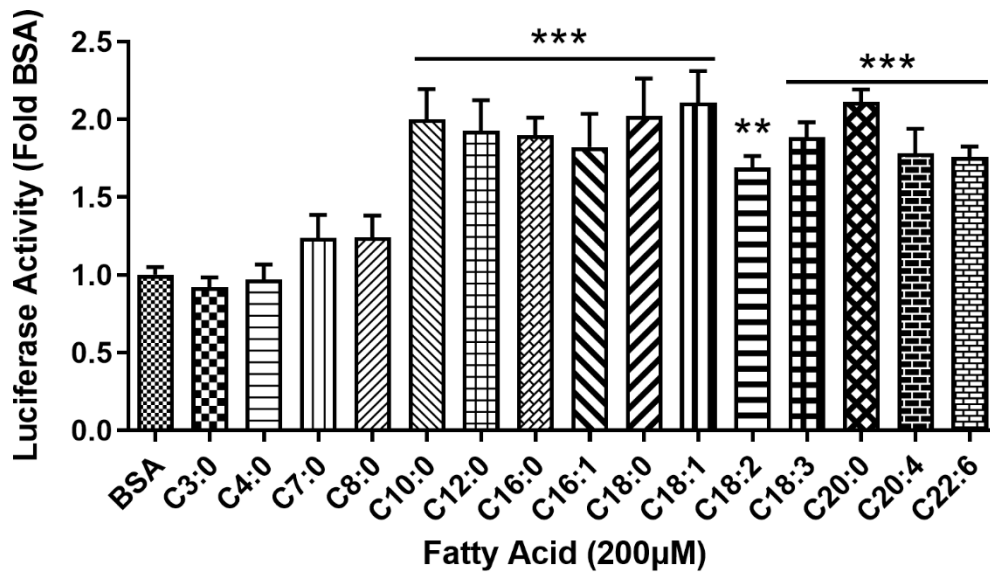

**Figure S2.** The LC-acyl-CoA sensor detects fatty acids of carbon chain length  $\geq 10$ , related to **Figure 2**. 293A cells were co-transfected with ABHD5-GlucC and PLIN5<sup>384-417</sup>-GlucN and treated with BSA or the indicated fatty acids for 3 hrs. \*\*,  $P < 0.01$ ; \*\*\*,  $P < 0.001$  compared to BSA as determined using one-way analysis of variance (ANOVA) with Dunnett's post t-test. Data was normalized to fold BSA and results are the average to two independent experiments.

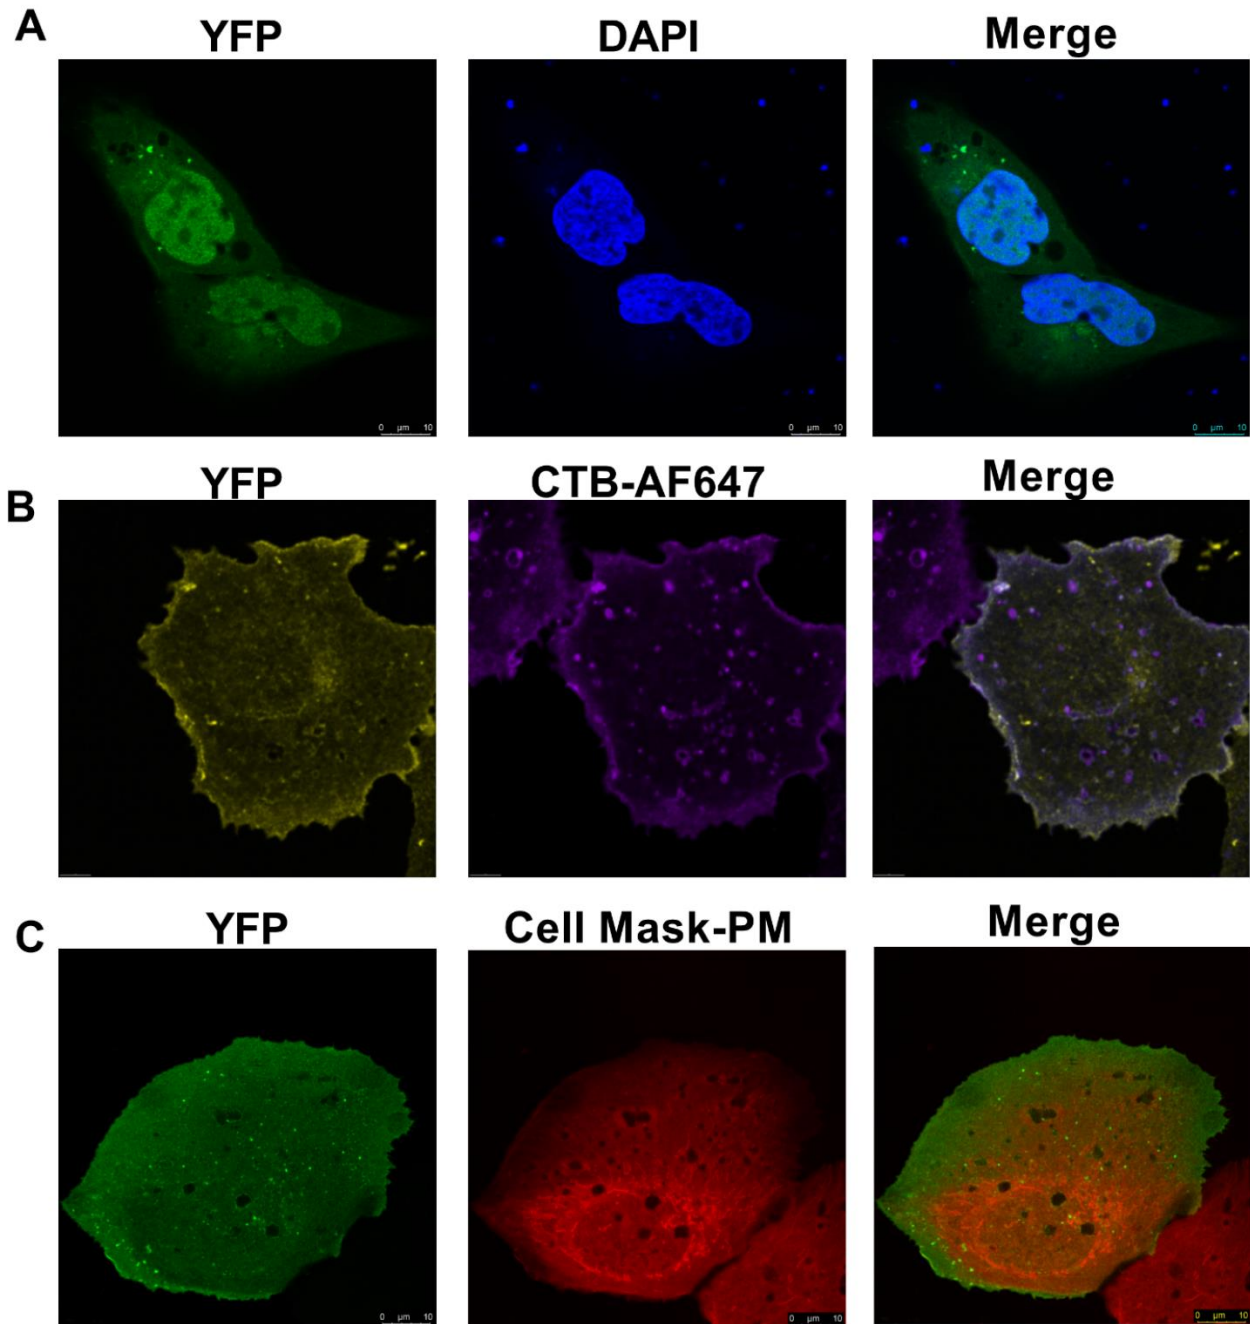

**Figure S3. Organelle staining of targeted LC-acyl-CoA sensors, related to Figure 4.** **A**, U2OS cells transiently transfected with the ABHD5<sup>R116N</sup> LC-acyl-CoA sensor (YFP, green) and stained with for nuclei with DAPI demonstrating co-localization in the merged image (Merge). Scale bar, 10 μm. **B**, U2OS cells transiently transfected with the Lyn11 tagged ABHD5<sup>R116N</sup> LC-acyl-CoA sensor (YFP, yellow) and stained with Cholera Toxin B conjugated Alex Fluor 647 (CTB-AF647, Magenta)

demonstrating co-localization in the merged image (Merge). **C**, U2OS cells transiently transfected with the Lyn11 tagged ABHD5<sup>R116N</sup> LC-acyl-CoA sensor (YFP, green) and stained with CellMask Deep Red Plasma Membrane Stain (Cell Mask-PM, Red) demonstrating co-localization in the merged image (Merge). Scale bar, 10  $\mu$ m. Results are from one experiment and are representative of three independent experiments.
